# Supplementary material for: An interpretable generative multimodal neuroimaging-genomics framework for decoding Alzheimer’s disease
Source: PubMed Central journal article supplement (PMC11213156), 2024-06-19
Supplement: NIHPP2406.13292v1-supplement-1.pdf [file NIHPP2406.13292v1-supplement-1.pdf]

# Supplementary Materials: An interpretable generative multimodal neuroimaging-genomics framework for decoding Alzheimer’s disease

Giorgio Dolci<sup>a,b</sup>, Federica Cruciani<sup>a\*</sup>, Md Abdur Rahaman<sup>b</sup>, Anees Abrol<sup>b</sup>, Jiayu Chen<sup>b</sup>,  
Zening Fu<sup>b</sup>, Iliara Boscolo Galazzo<sup>a</sup>, Gloria Menegaz<sup>a,\*\*</sup>, Vince D. Calhoun<sup>b,\*\*</sup>,  
for the Alzheimer’s Disease Neuroimaging Initiative<sup>1</sup>

<sup>a</sup>*Department of Engineering and Innovation Medicine, University of Verona, Verona, Italy*

<sup>b</sup>*Tri-Institutional Center for Translational Research in Neuroimaging and Data Science (TReNDS), Georgia State University, Georgia Institute of Technology, Emory University, Atlanta, GA, USA*

## Preprocessing quality control

A thorough quality control (QC) was performed to retain scans with good normalization to the standard MNI space, which involved discarding sMRI and fMRI images that exhibited low correlation with individual and/or group-level masks. In this spatial correlation process, we first calculated subject-level masks using the subject MRI scans (only the first volume in case of fMRI) by setting the brain voxels to 1 if the values of these voxels were greater than 80% of the average value across whole-brain voxels, and 0 otherwise. Next, after computing the subject-level masks, we calculated a group mask by setting the voxels to 1 for which at least 70% of the subject-level masks had a value of 1. Lastly, we examined the spatial correlations of the subject and group level masks and retained subjects that showed a correlation value greater than 0.85. Additionally, for fMRI, scans with larger head motion parameters ( $> 3^\circ$  rotations and  $> 3$  mm translations) were discarded.

arXiv:2406.13292v1 [q-bio.QM] 19 Jun 2024

---

\*Corresponding author: Department of Engineering and Innovation Medicine, University of Verona, Verona, Italy.  
*e-mail:* federica.cruciani@univr.it

\*\*Equally contributed as last authors to this work.

<sup>1</sup>Data used in preparation of this article were obtained from the Alzheimer’s Disease Neuroimaging Initiative (ADNI) database (adni.loni.usc.edu). As such, the investigators within the ADNI contributed to the design and implementation of ADNI and/or provided data but did not participate in analysis or writing of this report. A complete listing of ADNI investigators can be found at: [http://adni.loni.usc.edu/wp-content/uploads/how\\_to\\_apply/ADNI\\_Acknowledgement\\_List.pdf](http://adni.loni.usc.edu/wp-content/uploads/how_to_apply/ADNI_Acknowledgement_List.pdf)

## Results

Table 1: In this Table are reported the correspondences acronym - full name of the sMRI brain regions under analysis.

| Acronym | Full name                                    | Acronym | Full name                 |
|---------|----------------------------------------------|---------|---------------------------|
| Ins     | Insular Cortex                               | OFG     | Occipital Fusiform Gyrus  |
| TP      | Temporal Pole                                | COpC    | Central Opercular Cortex  |
| ScC     | Subcallosal Cortex                           | POpC    | Parietal Operculum Cortex |
| CGp     | Cingulate Gyrus, posterior division          | Thl     | Thalamus                  |
| PcC     | Precuneous Cortex                            | Cau     | Caudate                   |
| FOC     | Frontal Orbital Cortex                       | Put     | Putamen                   |
| PhGa    | Parahippocampal Gyrus, anterior division     | Pall    | Pallidum                  |
| PaGp    | Parahippocampal Gyrus, posterior division    | Hipp    | Hippocampus               |
| LG      | Lingual Gyrus                                | Amy     | Amygdala                  |
| TFCp    | Temporal Fusiform Cortex, posterior division | Acc     | Accumbens                 |
| TOF     | Temporal Occipital Fusiform Cortex           |         |                           |

Table 2: In this Table are reported the 53 ICs present in the sFNC matrices with corresponding brain region name, network at which it belongs to, and spatial location in the brain along X, Y, and Z axis. SC=Sub-cortical; AU=Auditory; SM=sensorimotor; VI=visual; CC=cognitive-control; DM=default-mode; and CB=cerebellar. In *italic* are highlighted the brain regions present in the fMRI connectograms of Results section.

| IC ID | Brain region                        | Network | X     | Y     | Z     | IC ID | Brain region                         | Network | X     | Y     | Z     |
|-------|-------------------------------------|---------|-------|-------|-------|-------|--------------------------------------|---------|-------|-------|-------|
| 1     | Caudate                             | SC      | 6.5   | 10.5  | 5.5   | 26    | Inferior parietal lobule             | CC      | 45.5  | -61.5 | 43.5  |
| 2     | Subthalamus/hypothalamys            | SC      | -2.5  | -13.5 | -1.5  | 27    | Insula                               | CC      | -30.5 | 22.5  | -3.5  |
| 3     | Putamen                             | SC      | -26.5 | 1.5   | -0.5  | 28    | <i>Superior medial frontal gyrus</i> | CC      | -0.5  | 50.5  | 29.5  |
| 4     | Caudate                             | SC      | 21.5  | 10.5  | -3.5  | 29    | Inferior frontal gyrus               | CC      | -48.5 | 34.5  | -0.5  |
| 5     | Thalamus                            | SC      | -12.5 | -18.5 | 11.5  | 30    | Right inferior frontal gyrus         | CC      | 53.5  | 22.5  | 13.5  |
| 6     | Superior temporal gyrus             | AU      | 62.5  | -22.5 | 7.5   | 31    | Middle frontal gyrus                 | CC      | -41.5 | 19.5  | 26.5  |
| 7     | Middle temporal gyrus               | AU      | -42.5 | -6.5  | 10.5  | 32    | Inferior parietal lobule             | CC      | -53.5 | -49.5 | 43.5  |
| 8     | <i>Postcentral gyrus</i>            | SM      | 56.5  | -4.5  | 28.5  | 33    | <i>Left inferior parietal lobule</i> | CC      | 44.5  | -34.5 | 46.5  |
| 9     | <i>Left postcentral gyrus</i>       | SM      | -38.5 | -22.5 | 56.5  | 34    | Supplementary motor area             | CC      | -6.5  | 13.5  | 64.5  |
| 10    | <i>Paracentral lobule</i>           | SM      | 0.5   | -22.5 | 65.5  | 35    | Superior frontal gyrus               | CC      | -24.5 | 26.5  | 49.5  |
| 11    | <i>Right postcentral gyrus</i>      | SM      | 38.5  | -19.5 | 55.5  | 36    | Middle frontal gyrus                 | CC      | 30.5  | 41.5  | 28.5  |
| 12    | <i>Superior parietal lobule</i>     | SM      | -18.5 | -43.5 | 65.5  | 37    | Hippocampus                          | CC      | 23.5  | -9.5  | -16.5 |
| 13    | <i>Paracentral lobule</i>           | SM      | -18.5 | -9.5  | 56.5  | 38    | <i>Left inferior parietal lobule</i> | CC      | 45.5  | -61.5 | 43.5  |
| 14    | <i>Precentral gyrus</i>             | SM      | -42.5 | -7.5  | 46.5  | 39    | Middle cingulate cortex              | CC      | -15.5 | 20.5  | 37.5  |
| 15    | <i>Superior parietal lobule</i>     | SM      | 20.5  | -63.5 | 58.5  | 40    | Inferior frontal gyrus               | CC      | 39.5  | 44.5  | -0.5  |
| 16    | <i>Postcentral gyrus</i>            | SM      | -47.5 | -27.5 | 43.5  | 41    | Middle frontal gyrus                 | CC      | -26.5 | 47.5  | 5.5   |
| 17    | <i>Calcarine gyrus</i>              | VI      | -12.5 | -66.5 | 8.5   | 42    | <i>Hippocampus</i>                   | CC      | -24.5 | -36.5 | 1.5   |
| 18    | <i>Middle occipital gyrus</i>       | VI      | -23.5 | -93.5 | -0.5  | 43    | Precuneus                            | DM      | -8.5  | -66.5 | 35.5  |
| 19    | Middle temporal gyrus               | VI      | 48.5  | -60.5 | 10.5  | 44    | <i>Precuneus</i>                     | DM      | -12.5 | -54.5 | 14.5  |
| 20    | <i>Cuneus</i>                       | VI      | 15.5  | -91.5 | 22.5  | 45    | <i>Anterior cingulate cortex</i>     | DM      | -2.5  | 35.5  | 2.5   |
| 21    | <i>Right middle occipital gyrus</i> | VI      | 38.5  | -73.5 | 6.5   | 46    | Posterior cingulate cortex           | DM      | -5.5  | -28.5 | 26.5  |
| 22    | <i>Fusiform gyrus</i>               | VI      | 29.5  | -42.5 | -12.5 | 47    | <i>Anterior cingulate cortex</i>     | DM      | -9.5  | 46.5  | -10.5 |
| 23    | <i>Inferior occipital gyrus</i>     | VI      | -36.5 | -76.5 | -4.5  | 48    | <i>Precuneus</i>                     | DM      | -0.5  | -48.5 | 49.5  |
| 24    | <i>Lingual gyrus</i>                | VI      | -8.5  | -81.5 | -4.5  | 49    | Posterior cingulate cortex           | DM      | -2.5  | 54.5  | 31.5  |
| 25    | <i>Middle temporal gyrus</i>        | VI      | -44.5 | -57.5 | -7.5  | 50    | <i>Cerebellum</i>                    | CB      | -30.5 | -54.5 | -42.5 |
|       |                                     |         |       |       |       | 51    | <i>Cerebellum</i>                    | CB      | -32.5 | -79.5 | -37.5 |
|       |                                     |         |       |       |       | 52    | <i>Cerebellum</i>                    | CB      | 20.5  | -48.5 | -40.5 |
|       |                                     |         |       |       |       | 53    | <i>Cerebellum</i>                    | CB      | 30.5  | -63.5 | -40.5 |

Table 3: Most significant biological processes for AD patients obtained from the analysis of the most relevant SNPs with positive IG attributions. In this Table are shown the biological processes, their raw  $p$ -value, Benjamini adj.  $p$ -value, and the overlap genes.

| Biological processes                                                                                         | GO term    | p-value           | Adj. p-value | Overlap genes                                                               |
|--------------------------------------------------------------------------------------------------------------|------------|-------------------|--------------|-----------------------------------------------------------------------------|
| Membrane organization                                                                                        | GO:0061024 | $2.124452e^{-05}$ | 0.02080757   | APOA2, CR1, PICALM, MTSS2, PLCG2, RABEP1, NSF, RAB12, NECTIN2, APOE, TOMM40 |
| Regulation of vesicle-mediated transport                                                                     | GO:0060627 | $2.550375e^{-05}$ | 0.02080757   | FCER1G, APOE2, PICALM, SORL1, PLCG2, CDH13, NSF, RAB12, APOE                |
| Regulation of metalloendopeptidase activity involved in amyloid precursor protein catabolic process          | GO:1902962 | $3.456407e^{-05}$ | 0.02080757   | PICALM, SORL1                                                               |
| Negative regulation of metalloendopeptidase activity involved in amyloid precursor protein catabolic process | GO:1902963 | $3.456407e^{-05}$ | 0.02080757   | SORL1, PICALM                                                               |
| Positive regulation of amyloid fibril formation                                                              | GO:1905908 | 0.0001032973      | 0.04974800   | USP8, APOE                                                                  |
| Response to lipoprotein particle                                                                             | GO:0055094 | 0.0001265865      | 0.05080336   | FCER1G, CDH13, APOE                                                         |
| Cellular response to lipoprotein particle stimulus                                                           | GO:0071402 | 0.0001788776      | 0.06153390   | FCER1G, CDH13, APOE                                                         |
| Negative regulation of amyloid precursor protein catabolic process                                           | GO:1902992 | 0.000209563       | 0.06307846   | PICALM, SORL1, APOE                                                         |
| Developmental maturation                                                                                     | GO:0021700 | 0.0002708868      | 0.06856478   | OOSP2, PICALM, SLC24A4, ALDH1A2, BLOC1S3, ERCC2                             |
| Positive regulation of complement activation                                                                 | GO:0045917 | 0.0003417085      | 0.06856478   | CR1, PBH1                                                                   |
| Regulation of aspartic-type endopeptidase activity involved in amyloid precursor protein catabolic process   | GO:1902959 | 0.0003417085      | 0.06856478   | PICALM, SORL1                                                               |
| Negative regulation of metalloendopeptidase activity                                                         | GO:1904684 | 0.0003417085      | 0.06856478   | PICALM, SORL1                                                               |
| Platelet activation                                                                                          | GO:0030168 | 0.0003701587      | 0.06856478   | FCER1G, PLCG2, APOE, BLOC1S3                                                |
| Regulation of amyloid-beta formation                                                                         | GO:1902003 | 0.0004140288      | 0.07121295   | PICALM, SORL1, APOE                                                         |
| Positive regulation of CoA-transferase activity                                                              | GO:1905920 | 0.000510613       | 0.07584989   | APOA2, APOE                                                                 |

Table 4: Most significant biological processes for MCIc patients obtained from the analysis of the most relevant SNPs with positive IG attributions. In this Table are shown the biological processes, their raw  $p$ -value, Benjamini adj.  $p$ -value, and the overlap genes.

| Biological processes                                        | GO term    | p-value           | Adj. p-value | Overlap genes               |
|-------------------------------------------------------------|------------|-------------------|--------------|-----------------------------|
| Phospholipid efflux                                         | GO:0033700 | $5.528001e^{-07}$ | 0.001238272  | APOA2, ABCA7, APOE, APOC1   |
| Plasma lipoprotein particle assembly                        | GO:0034377 | $4.633589e^{-06}$ | 0.003459747  | APOA2, ABCA7, APOE, APOC1   |
| Protein-lipid complex assembly                              | GO:0065005 | $4.633589e^{-06}$ | 0.003459747  | APOA2, ABCA7, APOE, APOC1   |
| High-density lipoprotein particle assembly                  | GO:0034380 | $2.103289e^{-05}$ | 0.011778420  | APOA2, ABCA7, APOE          |
| Protein-lipid complex subunit organization                  | GO:0071825 | $4.876437e^{-05}$ | 0.017078497  | APOA2, ABCA7, APOE, APOC1   |
| Plasma lipoprotein particle organization                    | GO:0010873 | $4.876437e^{-05}$ | 0.017078497  | APOA2, ABCA7, APOE, APOC1   |
| Susceptibility to T cell mediated cytotoxicity              | GO:0060370 | $5.380257e^{-05}$ | 0.017078497  | PVR, NECTIN2                |
| High-density lipoprotein particle remodeling                | GO:0034375 | $6.099463e^{-05}$ | 0.017078497  | APOA2, APOE, APOC1          |
| Amyloid-beta formation                                      | GO:0034205 | $8.376335e^{-05}$ | 0.020847767  | PICALM, APH1B, ABCA7, APOE  |
| Positive regulation of phagocytosis                         | GO:0050766 | $9.47894e^{-05}$  | 0.021232826  | FCER1G, APOA2, PLCG2, ABCA7 |
| Cholesterol efflux                                          | GO:0033344 | 0.0001341986      | 0.023283667  | APOA2, ABCA7, APOE, APOC1   |
| Amyloid-beta metabolic process                              | GO:0050435 | 0.0001341986      | 0.023283667  | PICALM, APH1B, ABCA7, APOE  |
| Regulation of sterol transport                              | GO:0032371 | 0.0001496329      | 0.023283667  | APOA2, ABCA7, APOE, APOC1   |
| Regulation of cholesterol transport                         | GO:0032374 | 0.0001496329      | 0.023283667  | APOA2, ABCA7, APOE, APOC1   |
| Susceptibility to natural killer cell mediated cytotoxicity | GO:0042271 | 0.0001606363      | 0.023283667  | PVR, NECTIN2                |

Table 5: Most significant biological processes for MCInc patients obtained from the analysis of the most relevant SNPs with positive IG attributions. In this Table are shown the biological processes, their raw  $p$ -value, Benjamini adj.  $p$ -value, and the overlap genes.

| Biological processes                                            | GO term    | p-value           | Adj. p-value | Overlap genes                                           |
|-----------------------------------------------------------------|------------|-------------------|--------------|---------------------------------------------------------|
| Lymphocyte activation involved in immune response               | GO:0002285 | $2.662484e^{-05}$ | 0.02785800   | FCER1G, CR1, SPI1, PLCG2, RELB, ERCC1                   |
| Mature B cell differentiation involved in immune response       | GO:0002313 | $4.541461e^{-05}$ | 0.02785800   | CR1, SPI1, PLCG2                                        |
| Mature B cell differentiation                                   | GO:0002335 | $7.16821e^{-05}$  | 0.02785800   | CR1, SPI1, PLCG2                                        |
| B cell activation involved in immune response                   | GO:0002312 | $7.561089e^{-05}$ | 0.02785800   | CR1, SPI1, PLCG2, ERCC1                                 |
| Immune effector process                                         | GO:0002252 | $7.742635e^{-05}$ | 0.02785800   | FCER1G, APOA2, CR1, CR1L, SPI1, PLCG2, ACE, RELB, ERCC1 |
| Leukocyte mediated immunity                                     | GO:0002443 | 0.0001351098      | 0.04050933   | FCER1G, CR1, CR1L, SPI1, PLCG2, ACE, ERCC1              |
| Follicular B cell differentiation                               | GO:0002316 | 0.0001830395      | 0.04050933   | SPI1, PLCG2                                             |
| Leukocyte activation involved in immune response                | GO:0002366 | 0.0001887178      | 0.04050933   | FCER1G, CR1, SPI1, PLCG2, RELB, ERCC1                   |
| Cell activation involved in immune response                     | GO:0002263 | 0.0002026592      | 0.04050933   | FCER1G, CR1, SPI1, PLCG2, RELB, ERCC1                   |
| Regulation of complement-dependent cytotoxicity                 | GO:1903659 | 0.0004543273      | 0.07573962   | CR1, CR1L                                               |
| Immunoglobulin mediated immune response                         | GO:0016064 | 0.0005441211      | 0.07573962   | FCER1G, CR1, CR1L, ERCC1                                |
| B cell mediated immunity                                        | GO:0019724 | 0.0005752373      | 0.07573962   | FCER1G, CR1, CR1L, ERCC1                                |
| Protein transmembrane transport                                 | GO:0071806 | 0.0006028904      | 0.07573962   | TOMM40L, BLOC1S3, RTN2                                  |
| Regulation of complement activation, classical pathway          | GO:0030450 | 0.0006337818      | 0.07573962   | CR1, CR1L                                               |
| Negative regulation of complement activation, classical pathway | GO:0045959 | 0.0006337818      | 0.07573962   | CR1, CR1L                                               |

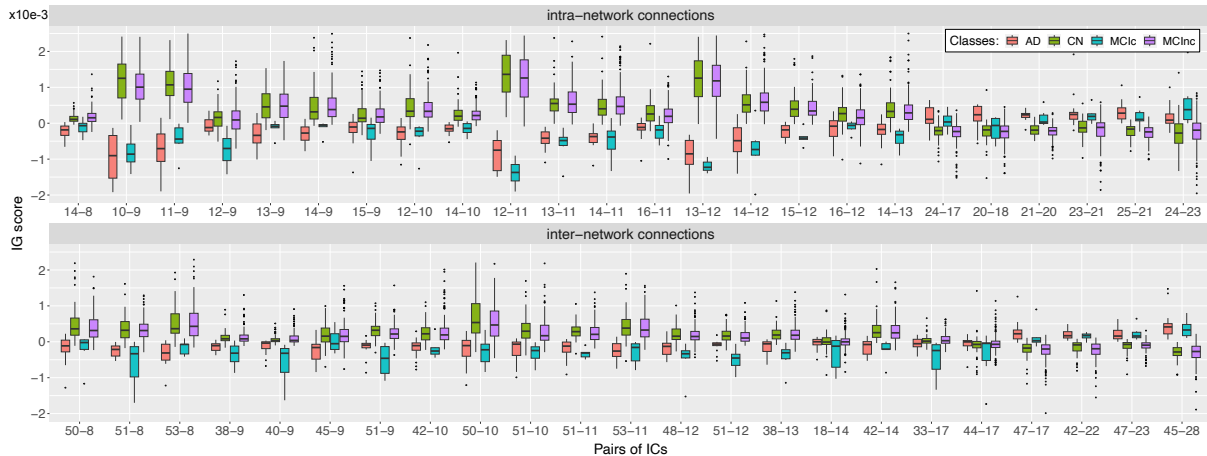

Figure 1: Boxplots that show the distributions of the subjects CN, AD, MCInc, and MCIc in the most important connections based on the fMRI IG score.
